# Supplementary material
Source: Royal Society of Chemistry journal article supplement (doi:10.1039/d6ay00544f)
Supplement: d6ay00544f1.pdf [file d6ay00544f1.pdf]

## Supplementary

Table S1 Main metal elements and properties of celery

| Metal (mg/kg DW)       |                        |         |        |        |      | pH   | Moisture content (%) |
|------------------------|------------------------|---------|--------|--------|------|------|----------------------|
| K                      | Ca                     | Mg      | Al     | Fe     | Zn   |      |                      |
| 91.2×10 <sup>3</sup> * | 23.7×10 <sup>3</sup> * | 4502.4* | 3363.6 | 943.1* | 87.8 | 6.05 | 93.7                 |

Note: \*content of metal element adopted in interference test

Table S2 Contents of major matrix substances in celery and the concentration for interference test

| Phytochemical    | Content (FW)         | Reference | Concentration for test |
|------------------|----------------------|-----------|------------------------|
| Nitrate          | 149.6 mg/100g        | [18]      | 150 mg/100 g           |
|                  | 490-1400 mg/kg       | [19]      |                        |
| Glucose          | 0.40 g/100g          | [20]      | 400 mg/100 g           |
| Aspartic acid    | 0.117g/100g          | [20]      | 120 mg/100 g           |
| Oxalate          | 23 mg/100 g          | [21]      | 40 mg/100 g            |
| Chlorogenic acid | 0.268-0.712 mg/g     | [22]      | 100 mg/100g            |
| Ascorbic acid    | 5.35-10.55 mg/100 g  | [23]      | 20 mg/100 g            |
|                  | 799.05 µg/g DW       | [24]      |                        |
|                  | 3.1 mg/100g          | [20]      |                        |
| Chlorophyll      | 0.81 mg/g            | [25]      | 100 mg/100 g           |
| β-Carotene       | 0.9915 mg/100g       | [26]      | 1 mg/100 g             |
|                  | 270ug/100g           | [20]      |                        |
| Apigenin         | 0.682-164.7 mg/kg DW | [27]      | 5 mg/100 g             |
|                  | 283.21 mg/kg DW      | [28]      |                        |

Table S3  $R_s$ ,  $R_f$ , and  $W_s$  values calculated through CNLS

|                | GPE   | NA-LO/GPE |
|----------------|-------|-----------|
| $R_s$ (ohm)    | 4.93  | 5.72      |
| CPE1 (mF)      | 1.05  | 0.95      |
| $R_f$ (ohm)    | 12.88 | 13.27     |
| CPE2 (mF)      | /     | 0.59      |
| $R_{ct}$ (ohm) | /     | 548.02    |
| $W_s$ (ohm)    | 498.4 | 375.97    |

Table S4 Comparison of NF-LO/GPE with other electrochemical detections of TMX

| Electrode             | Reproducibility | Storage Stability | Method | LOD                          | Linear range                        | Samples         | Recovery Rate  | Reference  |
|-----------------------|-----------------|-------------------|--------|------------------------------|-------------------------------------|-----------------|----------------|------------|
| NF-LO/GPE             | 3.89%           | 91.33% (14 d)     | LSV    | 0.028 mg/L<br>0.097 $\mu$ M* | 0.1-36 mg/L<br>0.34-123.71 $\mu$ M* | Celery          | 80.49%-104.64% | This study |
| Poly(L-Ornithine)/GCE | 2.90%           | 95.4 % (14 d)     | LSV    | 0.17 $\mu$ M                 | 0.5-9 $\mu$ M                       | Insecticide     | 96.51%~98.35%  | [4]        |
| $\beta$ -CD-rGO/GCE   | 4.3%            | 93.4% (7 d)       | LSV    | 0.27 $\mu$ M                 | 0.5-16 $\mu$ M                      | Brown<br>rice   | 92.20%~113.75% | [5]        |
| Ag@Gr/GCE             | 4.41%           | 90% (14 d)        | SWV    | 1.92 $\mu$ M                 | 5 $\mu$ M-1 mM                      | Tomato          | 90.17%~103.28% | [40]       |
| rGO/GCE               | 5.1%            | -                 | SWV    | 8.3 mM                       | 10-200 mM                           | Water,<br>Honey | 95.0%~99.8%    | [52]       |
| Nanosilver/SDS/GCE    | 3.9%            | -                 | DPV    | 0.1 $\mu$ M                  | 0.1-9 $\mu$ M                       | Potato          | 92.06%~97.40%  | [53]       |
| CB/SiTiSb/GCE         | 3.61%           | 98.58% (15 d)     | DPV    | 0.012 $\mu$ M                | 0.25-100.5 $\mu$ M                  | Water,<br>Honey | 86.9%~102.0%   | [7]        |
| MCH/Apt/AuNPs/rGO/SPE | 1.34%           | 83.36% (10 d)     | DPV    | 0.5 $\mu$ M                  | 0.5-3 $\mu$ M                       | Water,<br>Mango | 88.08%~111.75% | [9]        |
| Fe/BPDCA@GRP/MOF      | 2.14%           | > 96.85% (40 d)   | DPV    | 3.44 nM                      | 5-100 $\mu$ M                       | Orange          | 98.7%~103.2%   | [54]       |

Table S5 Recovery rates of thiamethoxam in spiked samples (n=3)

| spiked concentration<br>(mg/kg) | Recovery % |       |       | RSD  |
|---------------------------------|------------|-------|-------|------|
|                                 |            |       |       |      |
| 0.05                            | 83.16      | 81.09 | 92.21 | 5.91 |
| 0.1                             | 95.11      | 80.49 | 85.45 | 7.44 |
| 0.5                             | 104.64     | 95.61 | 90.96 | 6.96 |

Note: no TMX or CLO (< 0.01mg/kg) in unspiked celery detected by HPLC

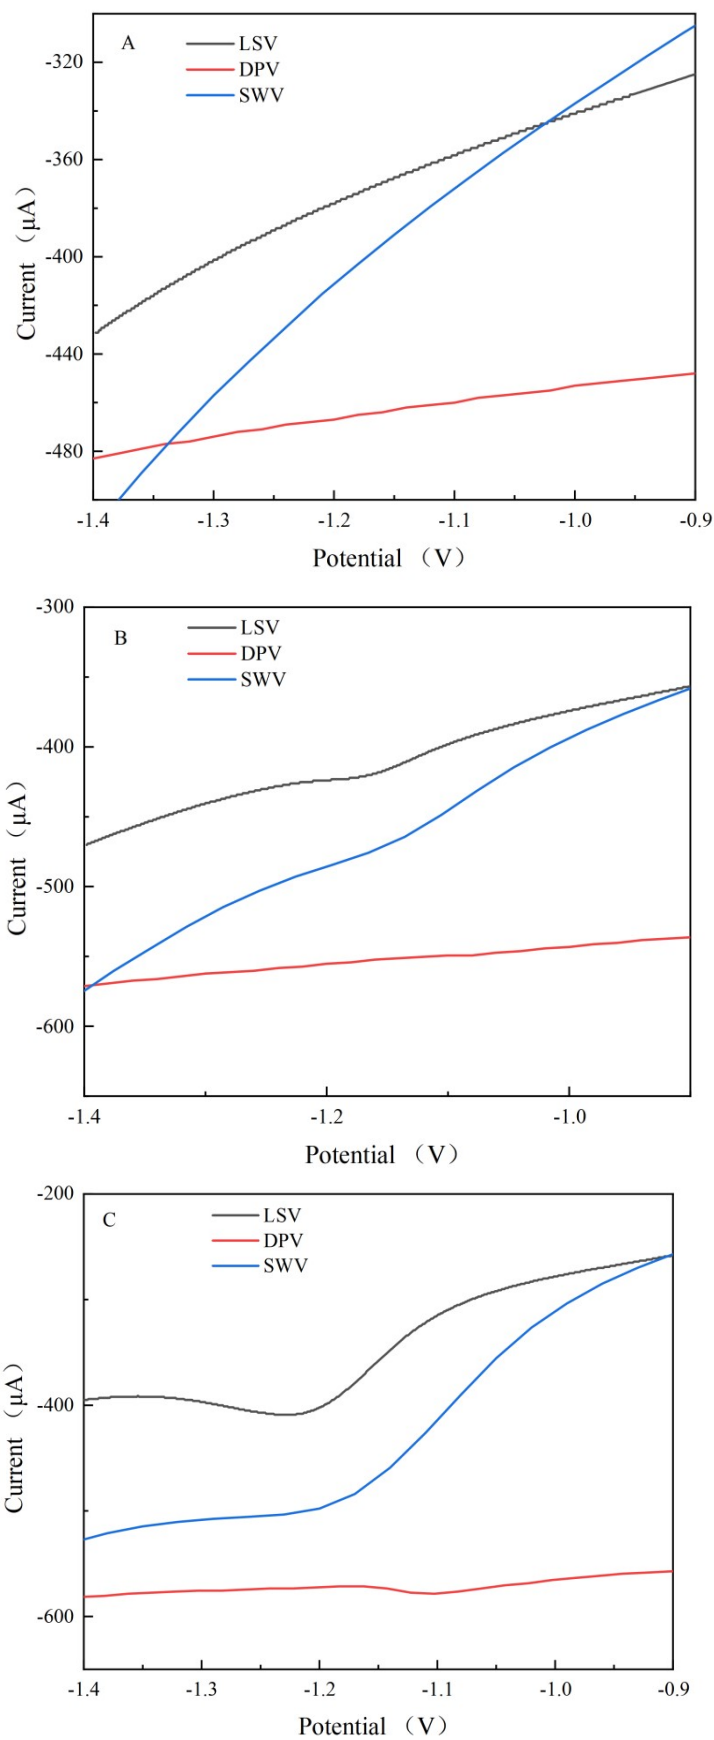

Fig. S1 Voltammograms of CK and TMX with three detection methods. A for CK voltammetry curve, B for 1 mg/L TMX detection, and C for 10 mg/L TMX detection.

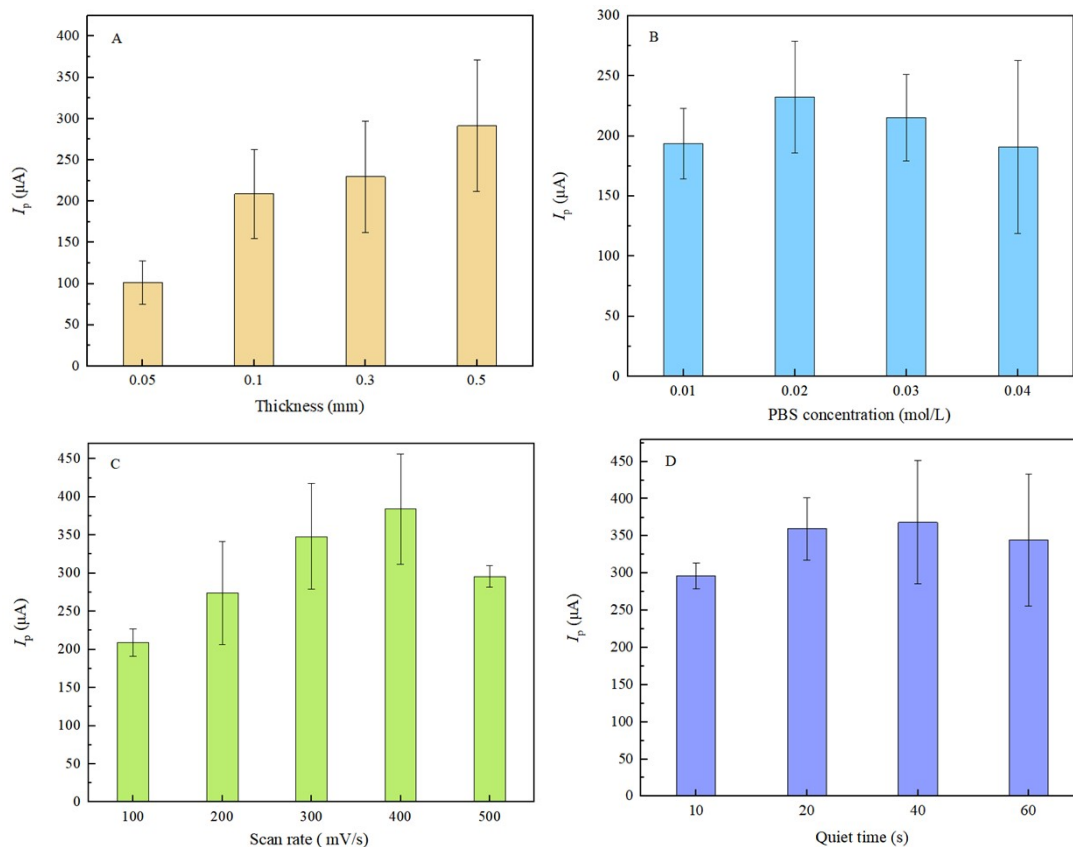

Fig. S2 Effect of graphite paper thickness (A), PBS concentration (B), scan rate (C) and quiet time (D) on detecting 10 mg/L TM. (A), (B) and (C) with the conditions of 0.01M PBS, 100 mV/s, and quiet at -0.6 V for 20s. (D) with the conditions of 0.02M PBS, 400 mV/s. And the work electrode in (B), (C) and (D) is 0.1mm-thick, 1x1 cm GPE.

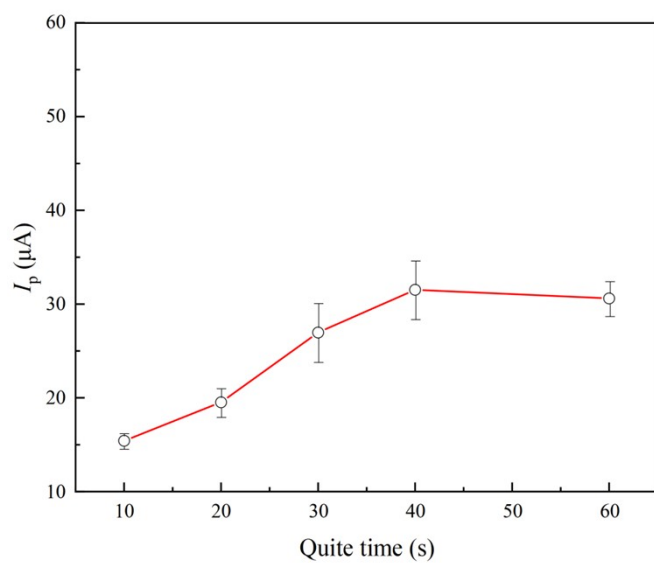

Fig. S3 Effect of quiet adsorption time on the peak current of low-concentration TMX (1 mg/L).

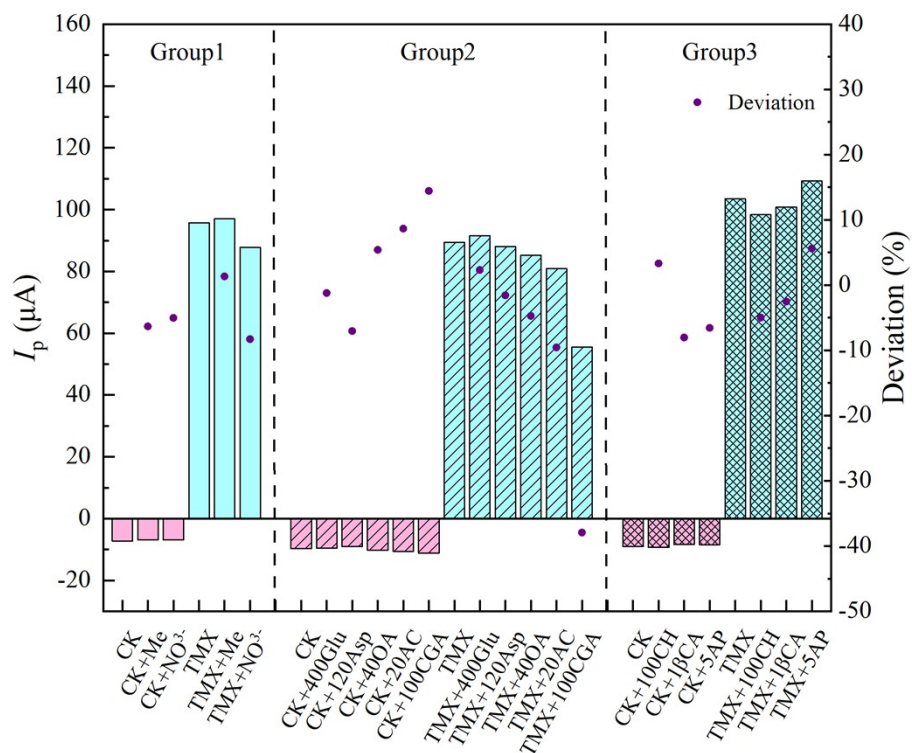

Fig. S4 Interferences of matrix substances on TMX (5 mg/L) detection. Group (1): 150mg/100g Nitrate and Me (including  $Mg^{2+}$ ,  $K^+$ ,  $Ca^{2+}$  and  $Fe^{3+}$ ). Group (2): Water-soluble organic matters included 400 mg/100g of Glu, 120 mg/100g of Asp, 40 mg/100g of OA, 20 mg/100g of AC and 100 mg/100g of CGA. Group (3): Plant pigment-derived hydrophobic organic matter included 25 mg/100g of CH, 1 mg/100g of  $\beta$ CA and 5 mg/100g of AP.

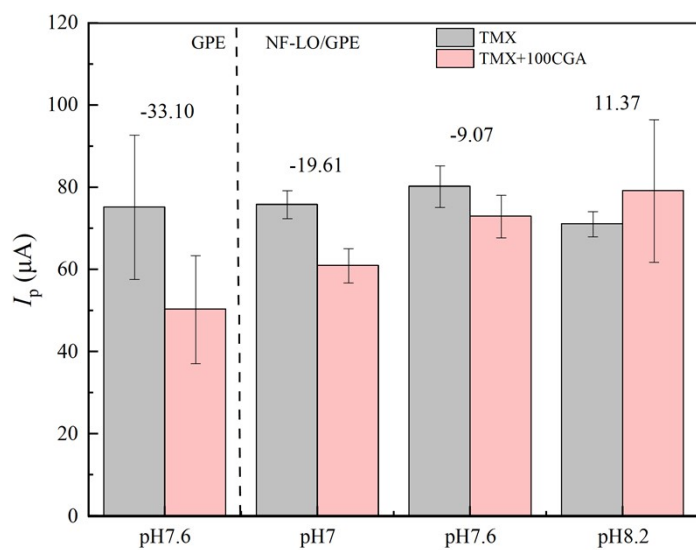

Fig. S5 Interference resistance of NF-LO/GPE to chlorogenic acid (CGA). The values are deviation rate relative to TMX.

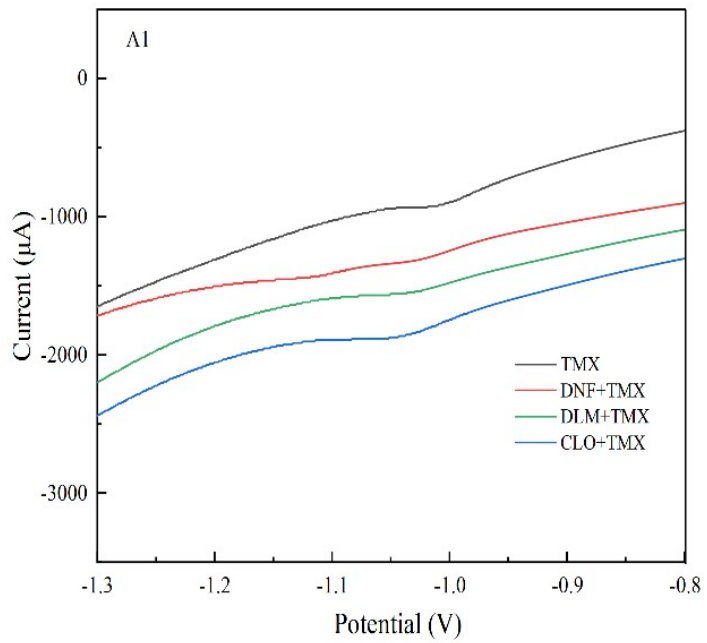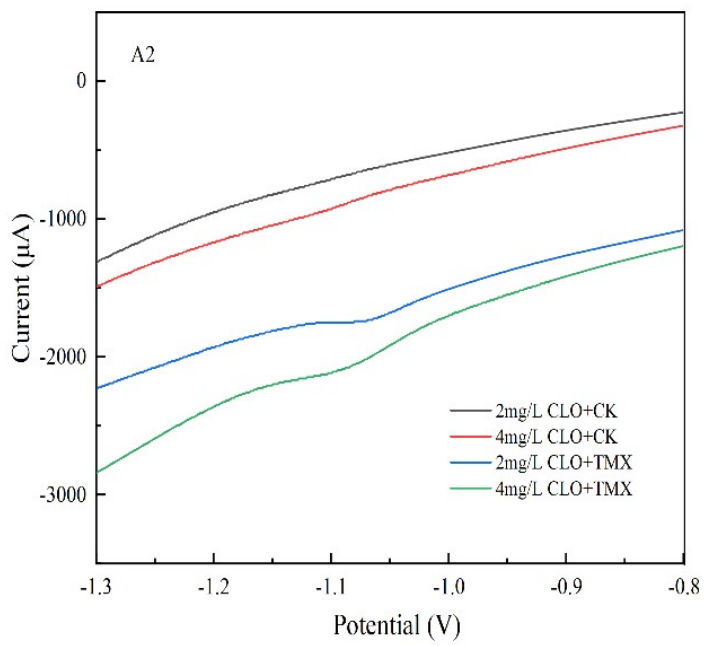

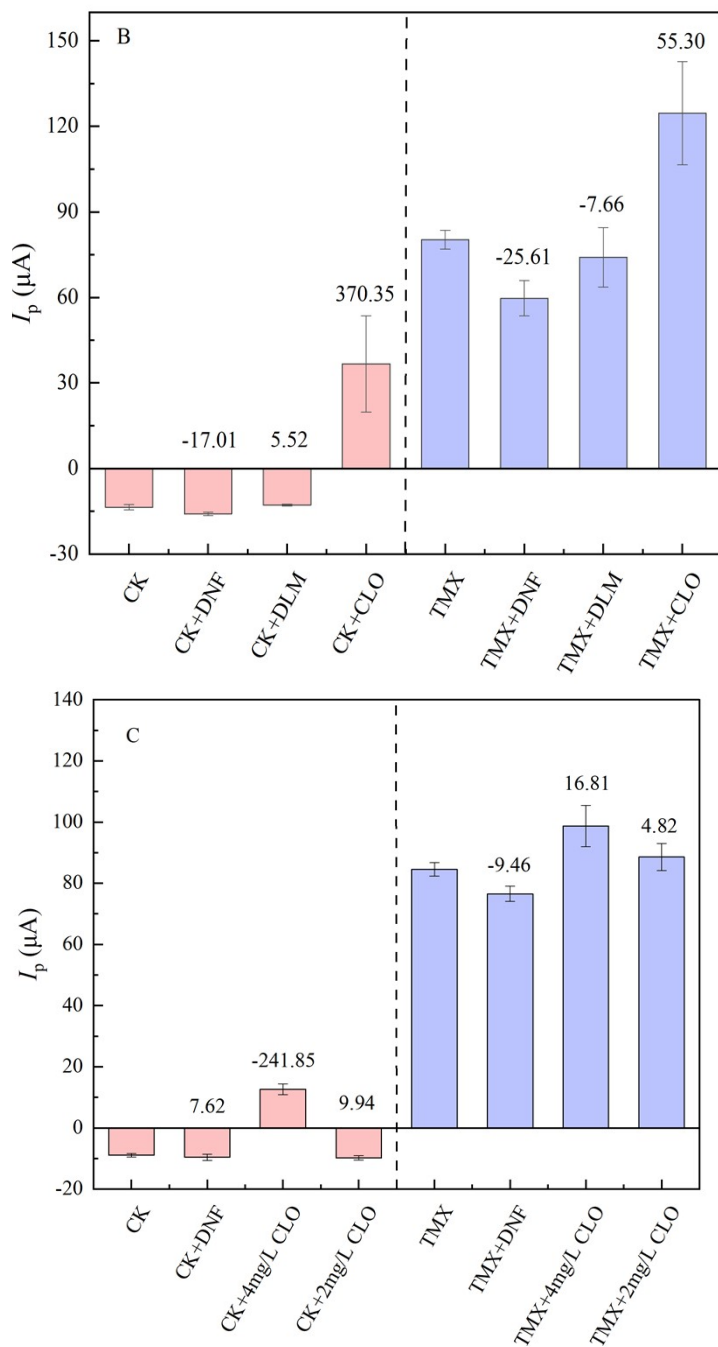

Fig. S6 (A1) The voltammograms of TMX and the co-occurring pesticides corresponding to the experimental group in Figure B. (A2) Interference of CLO after acidification. (B) Interference of pesticides without acidification treatment, (C) Interference of pesticides after acidification treatment.

\*the deviation rate (%)

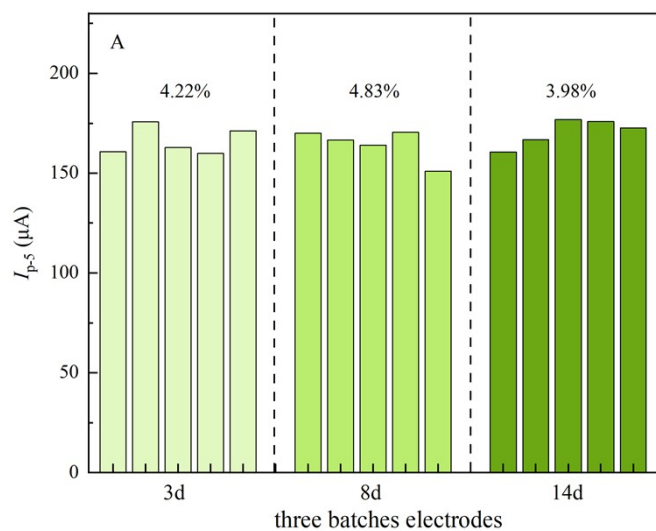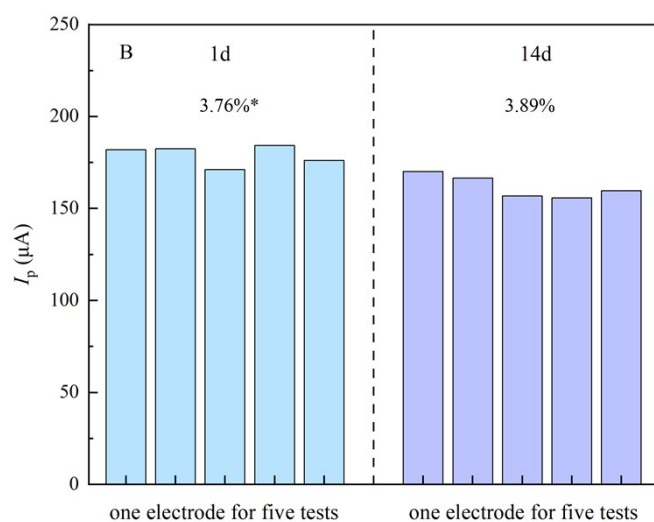

Fig. S7 Detection reproducibility, preparation reproducibility and storage stability of NF-LO/GPE. (A) Three batches prepared within 14d and five electrodes in each batch measured once. (B) Reproducibility of five repeated tests on one electrode. \* deviation rate

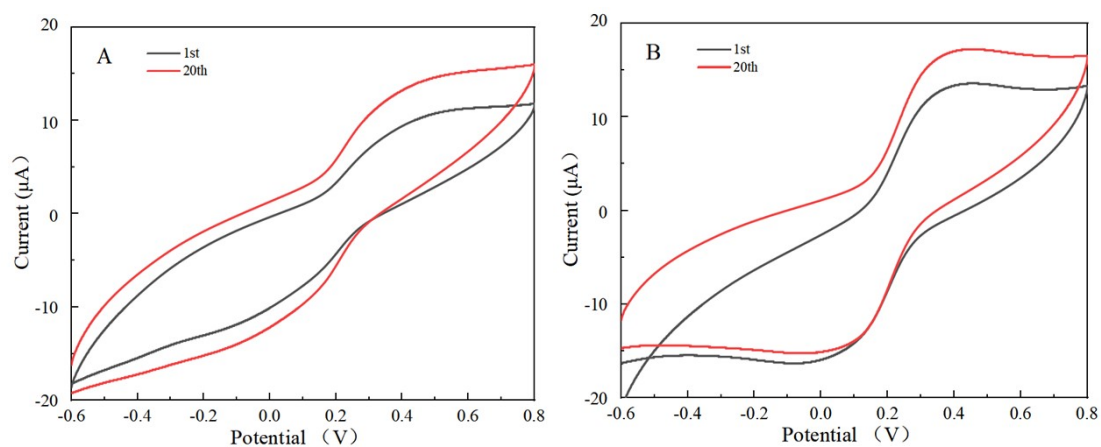

Fig. S8 Cyclic voltammograms of NF-LO/GPE (A) and GPE (B) in  $K_3[Fe(CN)_6]KCl$

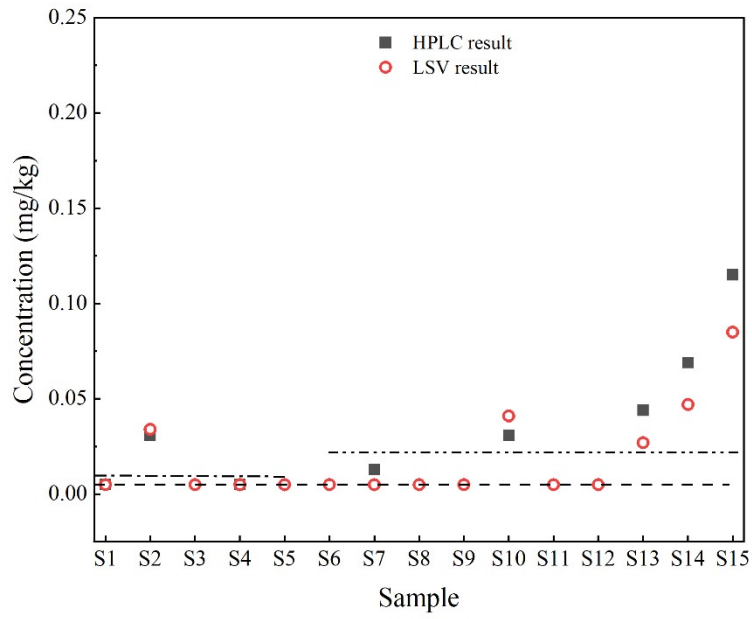

Fig. S9 Sample detection results with LSV and HPLC method. ND (not detected) is plotted in the figure at 1/2 LOD.
